# Supplementary figures and images for: The Definition of Pneumonia, the Assessment of Severity, and Clinical Standardization in the Pneumonia Etiology Research for Child Health Study
Source: PubMed Central journal article supplement — Clin Infect Dis. 2012 Apr 1;54(Suppl 2):S109–16. doi: 10.1093/cid/cir1065 (PMC3297550; doi:10.1093/cid/cir1065), 2012-04-01

Figure 1

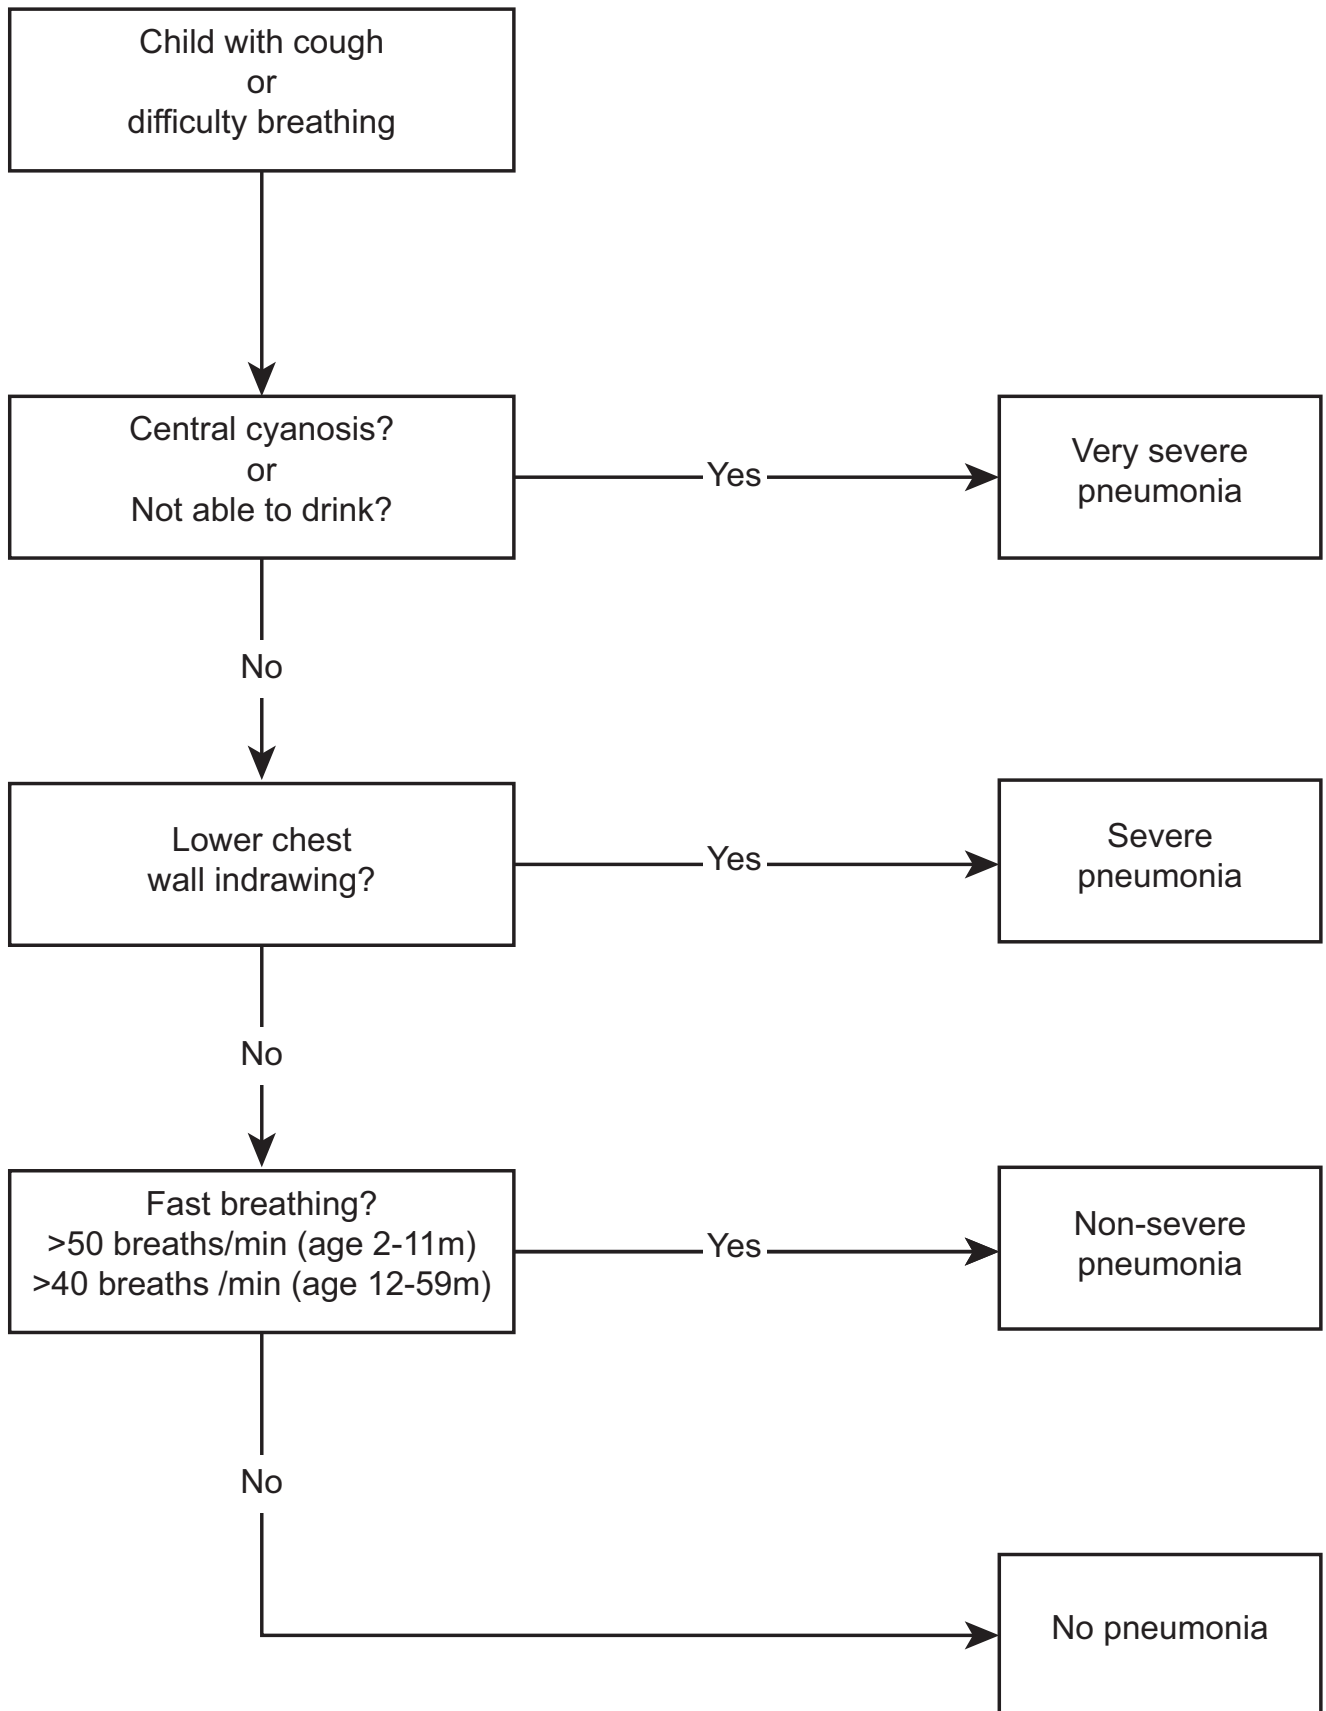

Figure 2

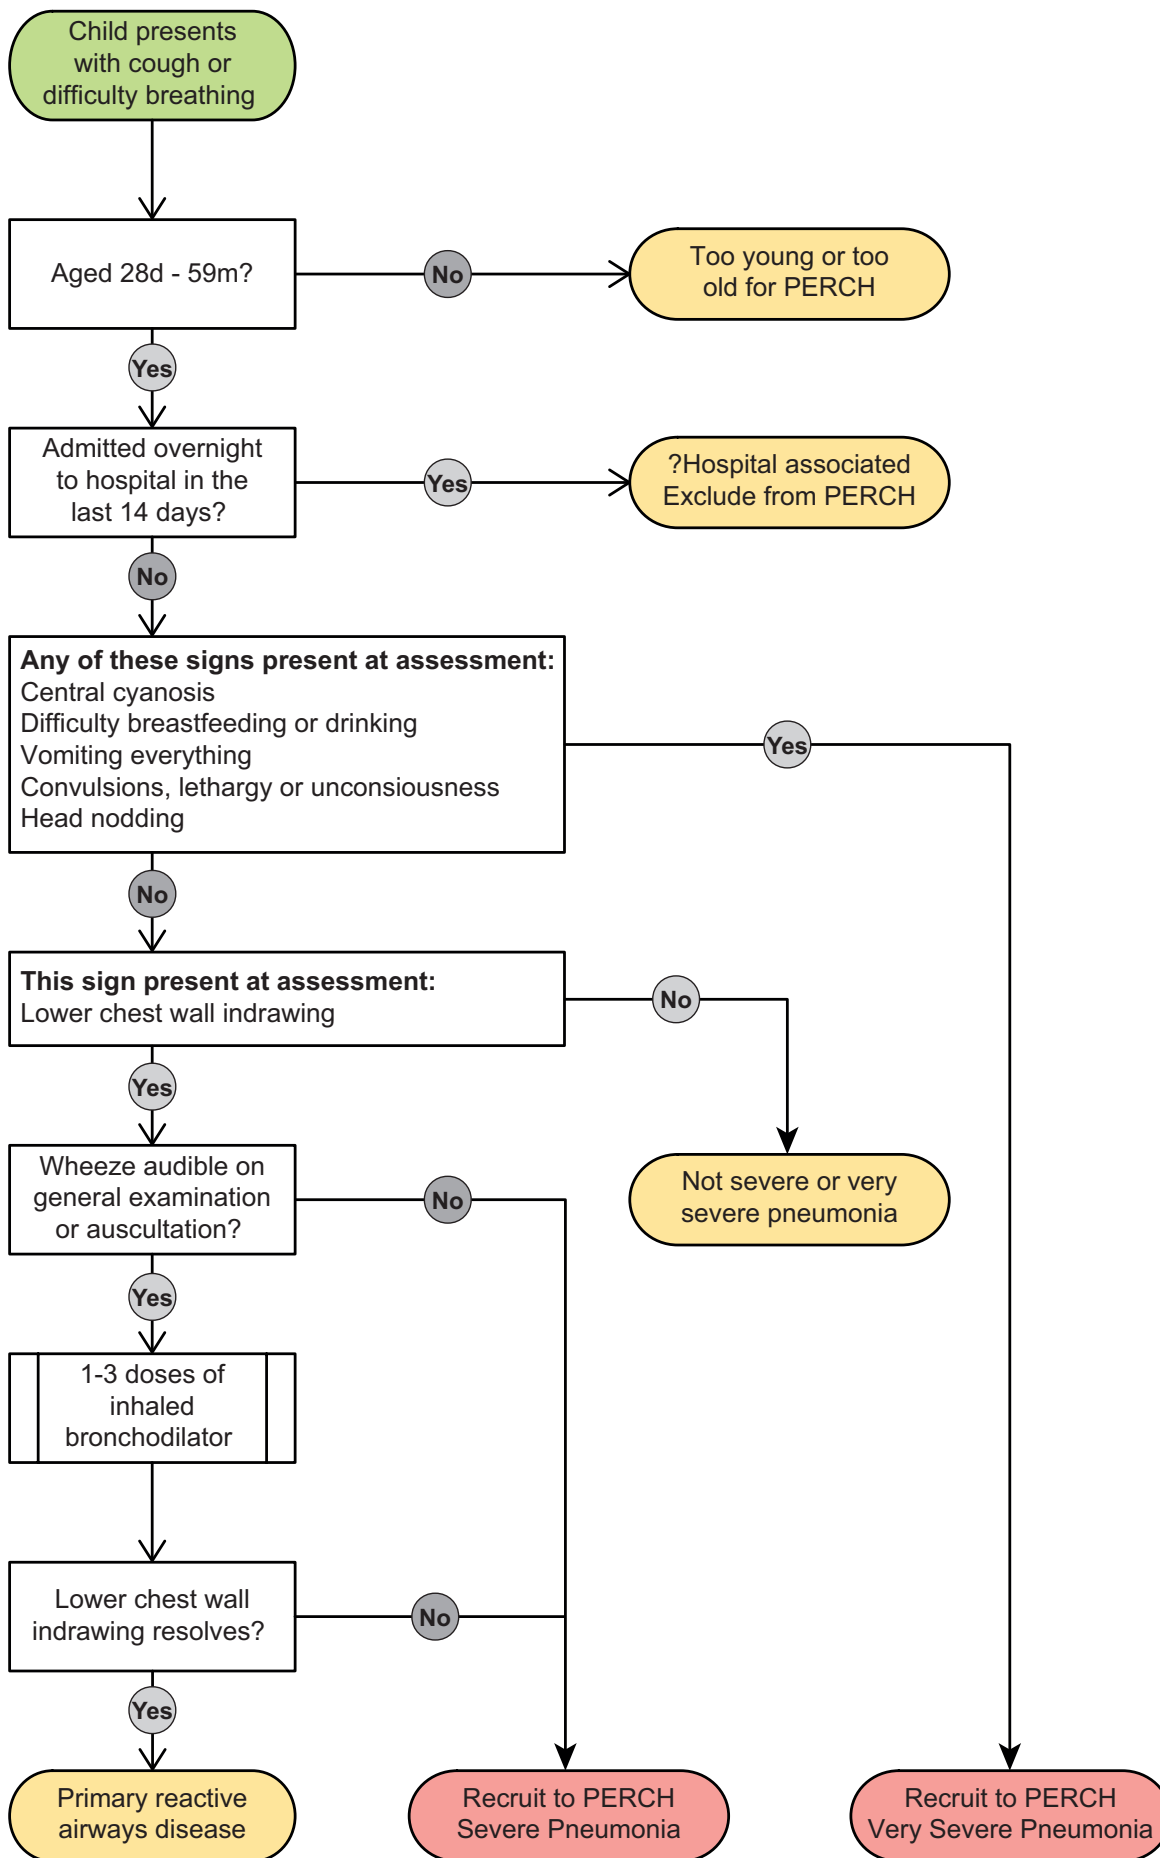

Supplement: supp_cir1065_Supp_Fig.pdf [file supp_cir1065_Supp_Fig.pdf]
